# Supplementary material
Source: ML conference proceedings conference paper supplement (https://openaccess.thecvf.com/content/CVPR2022/html/Fan_CADTransformer_Panoptic_Symbol_CVPR_2022_paper.html)
Supplement: Supplementary file 1 [file Fan_CADTransformer_Panoptic_Symbol_CVPR_2022_supplemental.pdf]

# CADTransformer: Panoptic Symbol Spotting Transformer for CAD Drawings (Supplementary Material)

Zhiwen Fan<sup>1</sup>, Tianlong Chen<sup>1</sup>, Peihao Wang<sup>1</sup>, Zhangyang Wang<sup>1</sup>

<sup>1</sup>The University of Texas at Austin

{zhiwenfan,tianlong.chen,peihaowang,atlaswang}@utexas.edu

## 1. Introduction

We provide the implementation details of our neighbor-aware attention layer, the demonstration of class-wise quantitative evaluation, additional qualitative results and the detailed visualization method in supplementary material due to the space limitation in the main draft.

## 2. Transformer Layer Details

As presented in Figure 2 of the main draft, the neighbor-aware self attention generates the attention results using the  $k$  neighbors of each token. We summarize the full algorithm of attention function in Algorithm 5. Here, we first find the nearest  $k$  primitives using Equation 4 in the main draft. Then we generate the  $\mathbf{Q}$ ,  $\mathbf{K}$ ,  $\mathbf{V}$  using a MLP and an indexing function. The relative position encoding is obtained by the relative 2D coordinates of primitives with MLPs. The final results were achieved by attention over the nearest  $k$  neighborhoods.

## 3. Additional Quantitative Evaluations

### 3.1. Class-wise Evaluation

We provide the detailed evaluation of panoptic quality(PQ), segmentation quality(SQ) and recognition quality(RQ) in Table 2. Here, we provide the class-wise evaluation of CNN-GCN based method PanCADNet [3], the proposed CADTransformer and the CADTransformer with Random Layer data augmentation. Note that, we show the results of CADTransformer using the pre-trained ViT [2] as its Transformer backbone.

### 3.2. Impacts of Pretrained Models

We have trained CADTransformer using the pre-trained ViT by Moco v3 [1]. As is shown in Table 1, the accuracy of using self-supervised pretraining (SSL) is better than without pretraining but is still below the accuracy using supervised pretraining. It inspires us to potentially pursue a new SSL framework for better representations of graphical primitives.

| Methods                 | PQ     | SQ     | RQ     |
|-------------------------|--------|--------|--------|
| ImageNet Pretrained [4] | 0.6894 | 0.8832 | 0.7333 |
| SSL Pretrained [1]      | 0.6744 | 0.8847 | 0.7106 |
| No Pretraining          | 0.6552 | 0.8785 | 0.6996 |

Table 1. The proposed transformer with different pre-trained strategies.

## 4. Qualitative Evaluations

We provide more visualized results of our proposed method and previous PanCADNet [3] in Figure 1 and Figure 2. As can be seen, CADTransformer is more powerful in recognizing closely related symbols and the primitives within incomplete symbols near the border of CAD drawings. To generate a unique color for all instances with the same semantic category, we follow the cocopanopticapi<sup>1</sup>, where we generate a random perturbation on the basic color value of each category. The visualization of basic color for each category is in Figure 3.

## 5. Futhur Works and Limitations

CADTransformer, the first transformer-based framework for panoptic symbol spotting task, can better reason the relationships among graphical primitives without handcrafted graph topology. Our solution can be applied to many other recognition tasks that depend on the similar input form of graphic primitives. For example, semantic sketch segmentation [5,6] aims to predict freehand sketching into semantic groups which can be solved via tokenizing the input stroke and using the plug-and-play  $k$  neighbors self-attention.

Although this work demonstrates the potentials of introducing transformer-based model for graphical data perception, some limitations still restrict its application: When the CADTransformer input with an extremely large drawing may consume tremendous amount GPU memory. The future work can focus on solving the memory bottleneck while keeping the accuracy for current models, one can apply a clustering algorithm on the drawing and only several clusters with fixed primitives numbers to be updated in each

<sup>1</sup><https://github.com/cocodataset/panopticapi>

layer. Then the training process for a graphical drawing can be scheduled with bounded memory and made it feasible to apply current transformer-based models to arbitrary large drawings as well as other vector data.

```
1 def Attention(xy, tokens, nn_dist, nn_k, MLP):
2     knn_idx = nn_dist[:, :, :nn_k] # find k nearest
3     xy_knn = index_points(xy, knn_idx)
4     qkv = get_qkv(tokens)
5     q_feat, k_feat, v_feat = qkv.unbind(0)
6     q = q_feat
7     k = index_points(k_feat, knn_idx)
8     v = index_points(v_feat, knn_idx)
9     pos_enc = MLP(xy - xy_knn)
10    attn = torch.sum(q * k, -1)
11    attn = F.softmax(attn, dim=-1) # feature dim
12    v = v + pos_enc # graphical entity PE
13    x = torch.sum(attn * v, -2) # k dim
14    return x
```

Listing 1. The Attention module in a PyTorch-like style

| Class           | Property                 | CADTransformer+RL |        |        | CADTransformer |        |        | PanCADNet [3] |        |        |
|-----------------|--------------------------|-------------------|--------|--------|----------------|--------|--------|---------------|--------|--------|
|                 | #Entity( $\times 10^3$ ) | PQ                | SQ     | RQ     | PQ             | SQ     | RQ     | PQ            | SQ     | RQ     |
| single door     | 171.30                   | 0.8049            | 0.9431 | 0.8535 | 0.797          | 0.9396 | 0.8482 | 0.5622        | 0.7945 | 0.7077 |
| double door     | 172.20                   | 0.8451            | 0.9386 | 0.9004 | 0.8317         | 0.9378 | 0.8868 | 0.6912        | 0.8191 | 0.8438 |
| sliding door    | 79.22                    | 0.8504            | 0.949  | 0.8961 | 0.8676         | 0.958  | 0.9056 | 0.7987        | 0.9071 | 0.8805 |
| folding door    | 3.27                     | 0.9054            | 0.9779 | 0.9259 | 0.7515         | 0.9619 | 0.7812 | 0.8159        | 0.9746 | 0.8372 |
| window          | 197.08                   | 0.7214            | 0.9155 | 0.788  | 0.7097         | 0.9168 | 0.7741 | 0.5558        | 0.7839 | 0.709  |
| bay window      | 6.01                     | 0.4058            | 0.945  | 0.4294 | 0.5195         | 0.9296 | 0.5588 | 0.0803        | 0.5645 | 0.1423 |
| blind window    | 36.09                    | 0.7436            | 0.9283 | 0.8011 | 0.831          | 0.9464 | 0.878  | 0.5827        | 0.8377 | 0.6955 |
| opening symbol  | 9.01                     | 0.3745            | 0.9551 | 0.3922 | 0.3204         | 0.9058 | 0.3537 | 0.2926        | 0.8945 | 0.3271 |
| sofa            | 44.25                    | 0.8405            | 0.9616 | 0.874  | 0.8469         | 0.9631 | 0.8794 | 0.6746        | 0.9278 | 0.7271 |
| bed             | 568.36                   | 0.7821            | 0.9201 | 0.8499 | 0.7915         | 0.9118 | 0.868  | 0.6654        | 0.8906 | 0.7472 |
| chair           | 251.67                   | 0.8028            | 0.9553 | 0.8404 | 0.7895         | 0.9465 | 0.8341 | 0.7602        | 0.9653 | 0.7876 |
| table           | 64.53                    | 0.7688            | 0.9606 | 0.8004 | 0.7812         | 0.9483 | 0.8237 | 0.6002        | 0.8631 | 0.6954 |
| TV cabinet      | 27.67                    | 0.8572            | 0.9548 | 0.8977 | 0.857          | 0.9488 | 0.9032 | 0.7665        | 0.9475 | 0.809  |
| Wardrobe        | 183.66                   | 0.8361            | 0.9503 | 0.8798 | 0.8384         | 0.9468 | 0.8855 | 0.8201        | 0.8816 | 0.9302 |
| cabinet         | 90.36                    | 0.6627            | 0.9109 | 0.7276 | 0.6963         | 0.918  | 0.7584 | 0.5998        | 0.8565 | 0.7002 |
| gas stove       | 93.16                    | 0.8877            | 0.9795 | 0.9063 | 0.8465         | 0.974  | 0.8691 | 0.9283        | 0.9916 | 0.9361 |
| sink            | 352.96                   | 0.8113            | 0.9503 | 0.8538 | 0.7763         | 0.9358 | 0.8295 | 0.7926        | 0.9332 | 0.8494 |
| refrigerator    | 30.30                    | 0.7778            | 0.942  | 0.8257 | 0.7331         | 0.9338 | 0.7851 | 0.6841        | 0.8726 | 0.784  |
| airconditioner  | 31.44                    | 0.6613            | 0.9775 | 0.6765 | 0.6533         | 0.9508 | 0.6871 | 0.6041        | 0.9379 | 0.6441 |
| bath            | 80.84                    | 0.628             | 0.928  | 0.6767 | 0.5568         | 0.9267 | 0.6008 | 0.3813        | 0.7785 | 0.4898 |
| bath tub        | 43.50                    | 0.8035            | 0.9329 | 0.8613 | 0.7359         | 0.9049 | 0.8132 | 0.5494        | 0.7713 | 0.7122 |
| washing machine | 68.66                    | 0.7543            | 0.9529 | 0.7916 | 0.6747         | 0.9288 | 0.7264 | 0.7428        | 0.9213 | 0.8062 |
| squat toilet    | 126.21                   | 0.8777            | 0.9535 | 0.9205 | 0.8581         | 0.9404 | 0.9125 | 0.8792        | 0.9434 | 0.9319 |
| urinal          | 94.25                    | 0.8648            | 0.9542 | 0.9062 | 0.7871         | 0.9343 | 0.8425 | 0.8492        | 0.9595 | 0.885  |
| toilet          | 275.67                   | 0.8724            | 0.9625 | 0.9064 | 0.8331         | 0.9322 | 0.8936 | 0.8482        | 0.9567 | 0.8865 |
| stairs          | 222.24                   | 0.7382            | 0.9105 | 0.8108 | 0.7117         | 0.9084 | 0.7834 | 0.5404        | 0.8084 | 0.6685 |
| elevator        | 102.05                   | 0.8635            | 0.9564 | 0.9029 | 0.8655         | 0.9549 | 0.9064 | 0.7477        | 0.8875 | 0.8425 |
| escalator       | 22.14                    | 0.4567            | 0.84   | 0.5437 | 0.4861         | 0.8251 | 0.5891 | 0.3936        | 0.8153 | 0.4828 |
| row chairs      | 540.56                   | 0.5229            | 0.9678 | 0.5403 | 0.4626         | 0.9667 | 0.4786 | 0.4603        | 0.953  | 0.483  |
| parking         | 271.24                   | 0.7177            | 0.9652 | 0.7436 | 0.6366         | 0.9689 | 0.657  | 0.5271        | 0.9275 | 0.5683 |
| wall            | 1362.03                  | 0.6205            | 0.792  | 0.7835 | 0.607          | 0.7771 | 0.7811 | 0.6231        | 0.7902 | 0.7886 |
| curtain wall    | 139.00                   | 0.3808            | 0.897  | 0.4245 | 0.4356         | 0.9212 | 0.4729 | 0.4224        | 0.9203 | 0.459  |
| total           | 5760.93                  | 0.6894            | 0.8832 | 0.7333 | 0.6732         | 0.8754 | 0.7226 | 0.5953        | 0.8258 | 0.6693 |

Table 2. Graphical entities number and quantitative results for each category. We demonstrate the comparisons of panoptic symbol spotting metric between our methods and previous CNN-GCN-based method [3]. Here, RL in the third column indicates the proposed Random Layer data augmentation. Note that, we skip the classes that contain less than  $1k$  graphical entities.

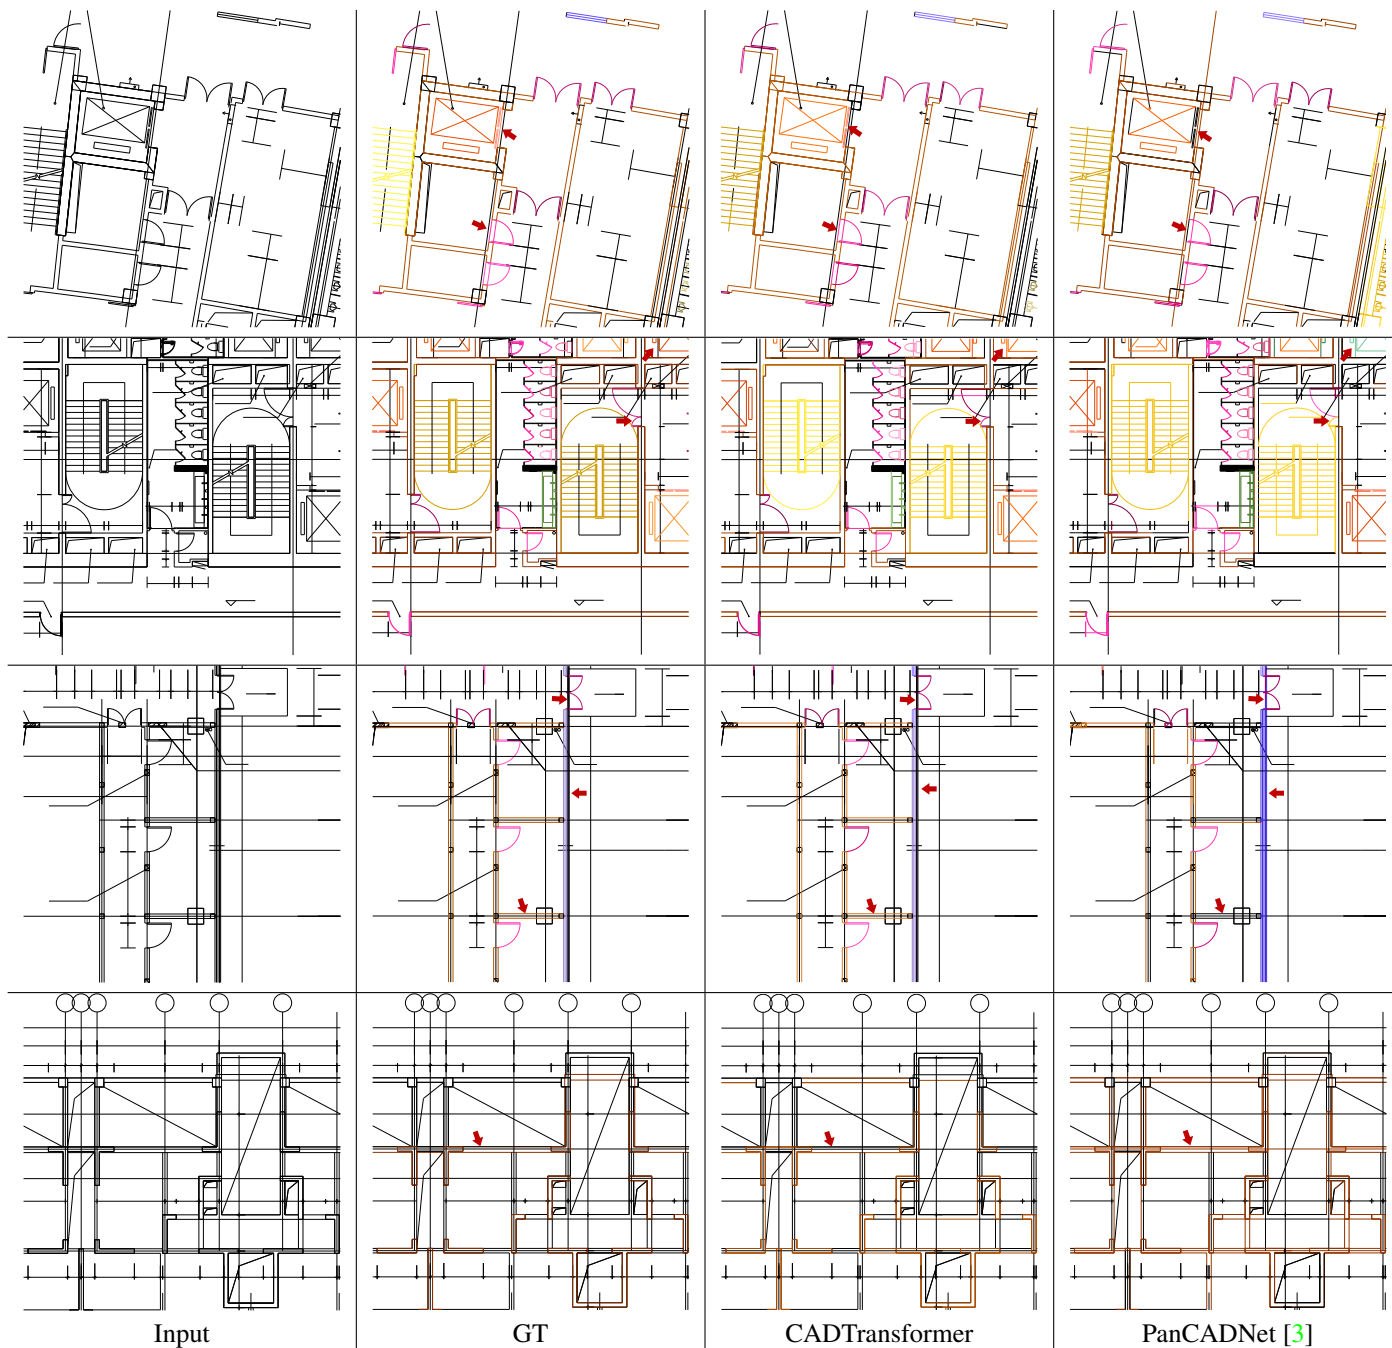

Figure 1. Qualitative comparisons between CADTransformer and GCN-CNN based method [3] on FloorPlanCAD dataset. Red arrows indicate representative graphical primitives. Visualization colors of each category can be found in Figure 3. Best view in color and zoom in.

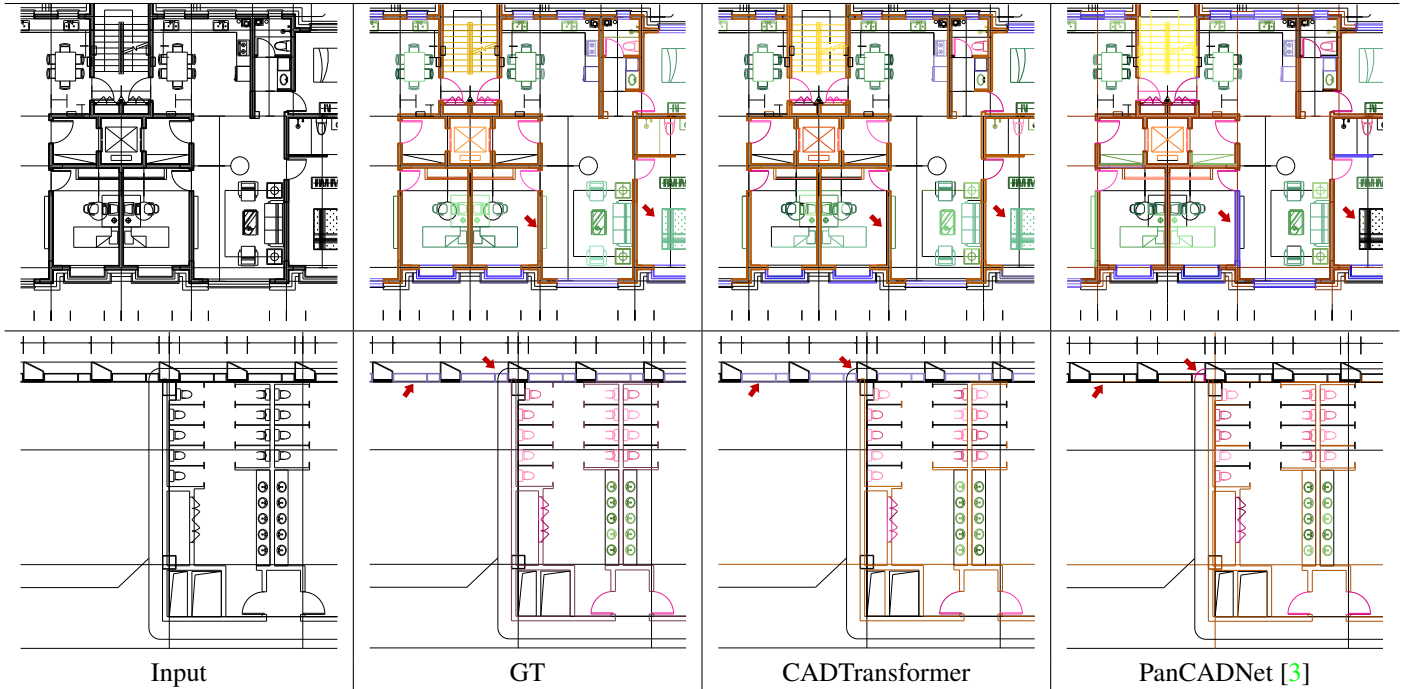

Figure 2. Qualitative comparisons between CADTransformer and GCN-CNN based method [3] on FloorPlanCAD dataset. Red arrows indicate representative graphical primitives. Visualization colors of each category can be found in Figure 3. Best view in color and zoom in.

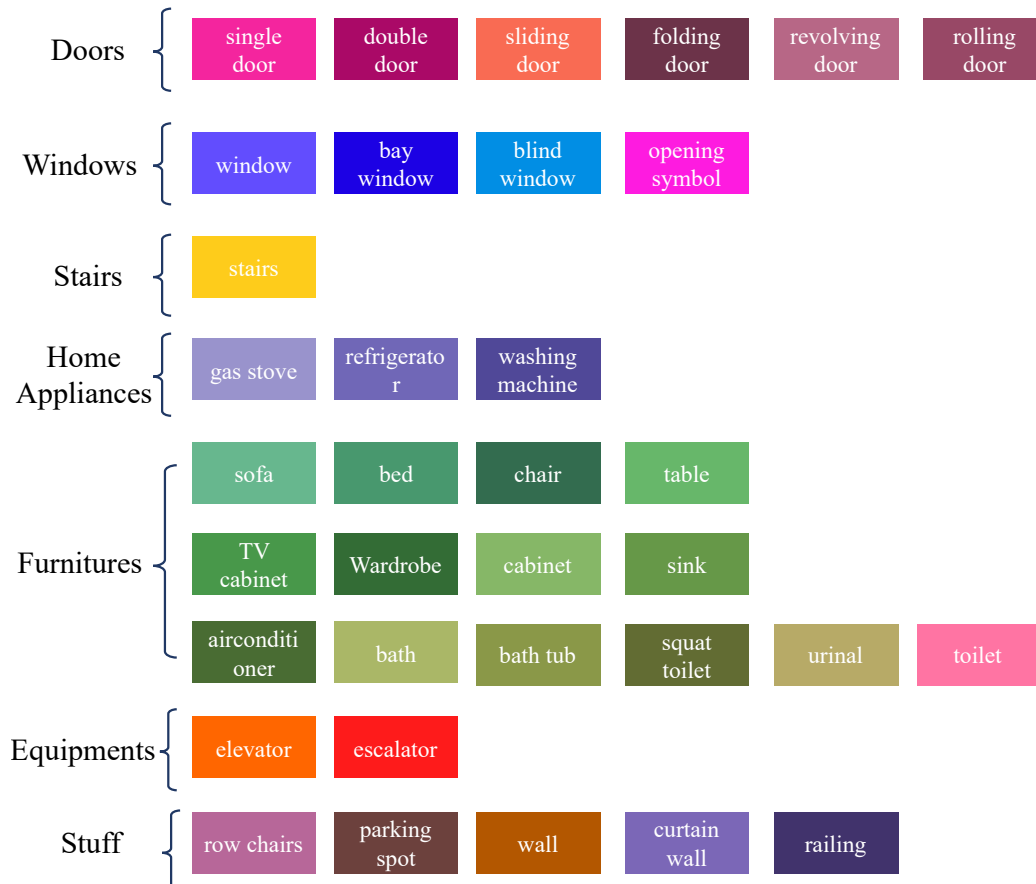

Figure 3. Visualized color map for each class and its belonging super-class.

## References

- [1] Xinlei Chen, Saining Xie, and Kaiming He. An empirical study of training self-supervised vision transformers. In *Proceedings of the IEEE/CVF International Conference on Computer Vision*, pages 9640–9649, 2021. [1](#)
- [2] Alexey Dosovitskiy, Lucas Beyer, Alexander Kolesnikov, Dirk Weissenborn, Xiaohua Zhai, Thomas Unterthiner, Mostafa Dehghani, Matthias Minderer, Georg Heigold, Sylvain Gelly, et al. An image is worth 16x16 words: Transformers for image recognition at scale. *arXiv preprint arXiv:2010.11929*, 2020. [1](#)
- [3] Zhiwen Fan, Lingjie Zhu, Honghua Li, Xiaohao Chen, Siyu Zhu, and Ping Tan. Floorplancad: A large-scale cad drawing dataset for panoptic symbol spotting. *arXiv preprint arXiv:2105.07147*, 2021. [1](#), [3](#), [4](#), [5](#)
- [4] Alex Krizhevsky, Ilya Sutskever, and Geoffrey E Hinton. Imagenet classification with deep convolutional neural networks. *Advances in neural information processing systems*, 25, 2012. [1](#)
- [5] Fang Liu, Xiaoming Deng, Yu-Kun Lai, Yong-Jin Liu, Cuixia Ma, and Hongan Wang. Sketchgan: Joint sketch completion and recognition with generative adversarial network. In *Proceedings of the IEEE/CVF Conference on Computer Vision and Pattern Recognition*, pages 5830–5839, 2019. [1](#)
- [6] Lumin Yang, Jiajie Zhuang, Hongbo Fu, Xiangzhi Wei, Kun Zhou, and Youyi Zheng. Sketchgnn: Semantic sketch segmentation with graph neural networks. *ACM Transactions on Graphics (TOG)*, 40(3):1–13, 2021. [1](#)
